# Supplementary material for: From kill the winner to eliminate the winner in open phage-bacteria systems
Source: PubMed Central journal article supplement (PMC9387927; doi:10.1371/journal.pcbi.1010400), 2022-08-08
Supplement: pcbi.1010400.s001.pdf [file pcbi.1010400.s001.pdf]

# From kill the winner to eliminate the winner in open phage-bacteria systems

Anastasios Marantos<sup>1</sup>, Namiko Mitarai<sup>1</sup>, Kim Sneppen<sup>1\*</sup>

**1** Center for Models of Life, Niels Bohr Institute, University of Copenhagen, Copenhagen, Denmark

\* ksneppen@gmail.com

## Supplementary

### S1 Appendix: Analytical calculations of Fig 3G

Our basic 3 node motif for elimination of faster growing bacteria can be expressed as:

$$\begin{aligned}\frac{dB_S}{dt} &= k_S B_S (1 - B_S - B_R) - \alpha B_S - \eta_S P B_S \\ \frac{dB_R}{dt} &= k_R B_R (1 - B_S - B_R) - \alpha B_R - \eta_R P B_R \\ \frac{dP}{dt} &= \beta(\eta_S B_S + \eta_R B_R) P - \delta P\end{aligned}$$

where  $\beta$  is burst size of phage, that for simplicity are assumed the same for each infection. Assuming that both bacterial strains co-exist ( $B_R, B_S > 0$ ) one obtain for the steady state:

$$\begin{aligned}1 - B_S - B_R &= (\alpha + \eta_S P)/k_S \\ 1 - B_S - B_R &= (\alpha + \eta_R P)/k_R\end{aligned}$$

Thus coexistence require:

$$\begin{aligned}(\alpha + \eta_S P)k_R &= (\alpha + \eta_R P)k_S \Rightarrow \\ P &= \frac{\alpha(1 - \frac{k_R}{k_S})}{\eta_S(\frac{k_R}{k_S} - \frac{\eta_R}{\eta_S})}\end{aligned}$$

For  $P > 0$  and  $\frac{dP}{dt} = 0$  we get:

$$\begin{aligned}\beta(\eta_S B_S + \eta_R B_R) - \delta &= 0 \Rightarrow \\ B_S &= \frac{\delta}{\beta\eta_S} - \frac{\eta_R}{\eta_S} B_R\end{aligned}$$

and as a result  $B_R = 1 - B_S - \eta_S P - \alpha$  becomes:

$$B_R = 1 - \left(\frac{\delta}{\beta\eta_S} - \frac{\eta_R}{\eta_S} B_R\right) - \eta_S \left(\frac{\alpha(1 - \frac{k_R}{k_S})}{\eta_S(\frac{k_R}{k_S} - \frac{\eta_R}{\eta_S})}\right) - \alpha$$

Therefore, at the steady state we have:

$$B_S = \frac{\delta}{\beta\eta_S} - \frac{\frac{\eta_R}{\eta_S}}{1 - \frac{\eta_R}{\eta_S}} \left( 1 - \frac{\delta}{\beta\eta_S} - \frac{\alpha(1 - \frac{\eta_R}{\eta_S})}{(\frac{k_R}{k_S} - \frac{\eta_R}{\eta_S})} \right) \quad (1)$$

$$B_R = \frac{1}{1 - \frac{\eta_R}{\eta_S}} \left( 1 - \frac{\delta}{\beta\eta_S} - \frac{\alpha(1 - \frac{\eta_R}{\eta_S})}{(\frac{k_R}{k_S} - \frac{\eta_R}{\eta_S})} \right) \quad (2)$$

$$P = \frac{\alpha(1 - \frac{k_R}{k_S})}{\eta_S(\frac{k_R}{k_S} - \frac{\eta_R}{\eta_S})} \quad (3)$$

(3) implies that ( $P > 0$ ) is only possible when  $k_S > k_R$  and  $k_R/k_S > \eta_R/\eta_S$ . I.e. that the ratio of the ratio of growth rates exceeds the ratio of susceptibilities. But in order to have at the same time  $B_S > 0$  and  $B_R > 0$  we need:

$$(2) \Rightarrow \frac{\delta}{\beta\eta_S} + \frac{\alpha(1 - \frac{\eta_R}{\eta_S})}{(\frac{k_R}{k_S} - \frac{\eta_R}{\eta_S})} < 1$$

$$(1) \Rightarrow \frac{\delta}{\beta\eta_S} > \frac{\frac{\eta_R}{\eta_S}}{1 - \frac{\eta_R}{\eta_S}} \left( 1 - \frac{\delta}{\beta\eta_S} - \frac{\alpha(1 - \frac{\eta_R}{\eta_S})}{(\frac{k_R}{k_S} - \frac{\eta_R}{\eta_S})} \right)$$

$$\text{that combined give : } \Rightarrow \frac{k_R}{k_S} > \alpha + (1 - \alpha)\left(\frac{\eta_R}{\eta_S}\right) \quad (4)$$

$$\text{and : } \Rightarrow \frac{k_R}{k_S} < \frac{\eta_R}{\eta_S} + \frac{\alpha\frac{\eta_R}{\eta_S}}{\frac{1 - \frac{\delta}{\beta\eta_S}}{1 - \frac{\eta_R}{\eta_S}} - 1} \quad (5)$$

and of course, by construction:

$$\frac{k_R}{k_S} < 1 \quad (6)$$

$$\frac{\eta_R}{\eta_S} < 1 \quad (7)$$

The inequalities (4),(5),(6),(7) define the region of coexistence in Figure 3G.

For  $1 > \frac{k_R}{k_S} > \frac{\eta_R}{\eta_S} + \frac{\alpha\frac{\eta_R}{\eta_S}}{\frac{1 - \frac{\delta}{\beta\eta_S}}{1 - \frac{\eta_R}{\eta_S}} - 1} \Rightarrow P > 0, B_S < 0, B_R > 0$  implying that the slower

growing but more resistant to phage attacks bacterial strain outcompetes the faster growing but susceptible in this parameter region with the help of the phages.

For  $\alpha + (1 - \alpha)\left(\frac{\eta_R}{\eta_S}\right) > \frac{k_R}{k_S} > \eta_R/\eta_S \Rightarrow P > 0, B_S > 0, B_R < 0$  meaning that despite the "help" from the phages, the resistance and growth of  $B_R$  is not high enough compared to  $B_S$  and it is driven to extinction.

For  $\frac{k_R}{k_S} < \eta_R/\eta_S < 1 \Rightarrow P < 0, B_S > 0, B_R < 0$ . The phages cannot survive. As a result  $B_R$  is also driven to extinction, as dictated by the competitive exclusion principle.
